# Supplementary material for: Drug-Review Deadlines and Safety Problems
Source: Atypon-hosted journal article supplement (doi:10.1056/nejmc086158), 2008-07-02
Supplement: nejm_carpenter_95sa1.pdf [file nejm_carpenter_95sa1.pdf]

## Supplementary Appendix

This appendix has been provided by the authors to give readers additional information about their work.

Supplement to: Carpenter D. Drug-review deadlines and safety problems. *N Engl J Med* 2008;359:95-8.



|       |                               |                                            |                                                                                                                                                                                        |                   |            |            |      |    |       |   |   |   |   |   |   |   |   |   |   |   |   |   |   |   |   |   |   |
|-------|-------------------------------|--------------------------------------------|----------------------------------------------------------------------------------------------------------------------------------------------------------------------------------------|-------------------|------------|------------|------|----|-------|---|---|---|---|---|---|---|---|---|---|---|---|---|---|---|---|---|---|
| 20886 | Alitretinoin                  | FDA has 5/26/97 subdate                    |                                                                                                                                                                                        | Panretin          | 5/26/1998  | 2/2/1999   | 1998 | 18 | 8.28  | 1 | 0 | 0 | 0 | 0 | 0 | 0 | 0 | 1 | 0 | 1 | 0 | 0 | 0 | 0 | 0 | 0 | 1 |
| 21001 | Almotriptan Malate            | FDA has 12/20/1999 subdate                 |                                                                                                                                                                                        | Axert             | 12/17/1999 | 5/7/2001   | 1999 | 19 | 16.90 | 0 | 0 | 0 | 0 | 0 | 0 | 0 | 0 | 1 | 0 | 0 | 0 | 0 | 0 | 0 | 0 | 0 | 1 |
| 21107 | Alosetron HC1                 | FDA has SBW in June 2000; BBW in June 2002 | This is CZA error, should have been included as BBW. Nardinelli coding is odd, however, in that it lists alosetron as having both SBW and BBW, even though the BBW comes after the SBW | Lotronex          | 6/29/1999  | 2/9/2000   | 1999 | 19 | 7.50  | 1 | 0 | 0 | 0 | 0 | 0 | 1 | 1 | 0 | 1 | 0 | 1 | 1 | 1 | 1 | 1 | 1 | 1 |
| 20965 | Aminolevulinic acid           |                                            |                                                                                                                                                                                        | Levulan Kerastick | 7/1/1998   | 12/3/1999  | 1998 | 18 | 17.10 | 0 | 0 | 0 | 0 | 0 | 0 | 0 | 0 | 1 | 1 | 0 | 0 | 0 | 0 | 0 | 0 | 0 | 1 |
| 20511 | Amlexanox                     |                                            |                                                                                                                                                                                        | Aphthasol         | 4/19/1995  | 12/17/1996 | 1995 | 15 | 19.99 | 1 | 0 | 0 | 0 | 0 | 0 | 0 | 0 | 1 | 1 | 0 | 1 | 0 | 0 | 0 | 0 | 0 | 1 |
| 21007 | Amprenavir                    |                                            |                                                                                                                                                                                        | Agenerase         | 10/16/1998 | 4/15/1999  | 1998 | 18 | 5.95  | 1 | 1 | 1 | 0 | 0 | 0 | 0 | 0 | 1 | 1 | 1 | 1 | 0 | 0 | 0 | 0 | 0 | 1 |
| 20333 | Anagrelide Hydrochloride      |                                            |                                                                                                                                                                                        | Agrylin           | 1/31/1996  | 3/14/1997  | 1996 | 16 | 13.41 | 1 | 0 | 0 | 0 | 0 | 0 | 0 | 0 | 1 | 1 | 0 | 1 | 0 | 0 | 0 | 0 | 0 | 1 |
| 20541 | Anastrozole                   |                                            |                                                                                                                                                                                        | Arimidex          | 3/29/1995  | 12/27/1995 | 1995 | 15 | 8.98  | 0 | 0 | 0 | 0 | 0 | 0 | 0 | 0 | 1 | 1 | 0 | 0 | 0 | 0 | 0 | 0 | 0 | 1 |
| 21264 | Apomorphine Hydrochloride     | Not in FDA data; may not be NME            |                                                                                                                                                                                        | Apokyn            | 12/31/2002 | 4/20/2004  | 2002 | 22 | 15.87 | 1 | 0 | 0 | 0 | 0 | 0 | 0 | 0 | 0 | 0 | 0 | 1 | 0 | 0 | 0 | 0 | 0 | 1 |
| 21549 | Aprepitant                    |                                            |                                                                                                                                                                                        | Emend             | 9/27/2002  | 3/26/2003  | 2002 | 22 | 6.00  | 1 | 1 | 1 | 0 | 0 | 0 | 0 | 0 | 1 | 1 | 1 | 1 | 0 | 0 | 0 | 0 | 0 | 1 |
| 20420 | Arbutamine Hydrochloride      | FDA has 1/6/1994 subdate                   |                                                                                                                                                                                        | Genesa            | 12/20/1993 | 9/12/1997  | 1993 | 13 | 44.78 | 0 | 0 | 0 | 0 | 0 | 0 | 0 | 0 | 1 | 0 | 0 | 0 | 0 | 0 | 0 | 0 | 0 | 1 |
| 20883 | Argatroban                    | FDA has 8/15/1997 subdate                  |                                                                                                                                                                                        | Acova             | 8/11/1997  | 6/30/2000  | 1997 | 17 | 35.13 | 0 | 0 | 0 | 0 | 0 | 0 | 0 | 0 | 1 | 0 | 0 | 0 | 0 | 0 | 0 | 0 | 0 | 1 |
| 21436 | Aripiprazole                  | FDA has BBW Feb 2006                       | BBW added after CZA stopped coding. This is a class relabeling.                                                                                                                        | Abilify           | 10/31/2001 | 11/15/2002 | 2001 | 21 | 12.67 | 0 | 0 | 0 | 0 | 0 | 0 | 0 | 1 | 0 | 1 | 0 | 0 | 0 | 0 | 1 | 0 | 0 | 1 |
| 21248 | Arsenic Trioxide              | FDA has 3/28/2000 subdate                  |                                                                                                                                                                                        | Trisenox          | 3/27/2000  | 9/25/2000  | 2000 | 20 | 6.07  | 1 | 1 | 1 | 0 | 0 | 0 | 0 | 0 | 0 | 1 | 1 | 1 | 0 | 0 | 0 | 0 | 0 | 1 |
| 20971 | Articaine HCl 4%; Epinephrine |                                            |                                                                                                                                                                                        | Septocaine        | 3/30/1998  | 4/3/2000   | 1998 | 18 | 24.50 | 0 | 0 | 0 | 0 | 0 | 0 | 0 | 0 | 1 | 1 | 0 | 0 | 0 | 0 | 0 | 0 | 0 | 1 |
| 21567 | Atazanavir Sulfate            |                                            |                                                                                                                                                                                        | Reyataz           | 12/20/2002 | 6/20/2003  | 2002 | 22 | 6.07  | 1 | 1 | 1 | 0 | 0 | 0 | 0 | 0 | 1 | 1 | 1 | 1 | 0 | 0 | 0 | 0 | 0 | 1 |
| 21411 | Atomoxetine                   | FDA has BBW Nov                            | BBW added after                                                                                                                                                                        | Strattera         | 10/11/2001 | 11/26/2002 | 2001 | 21 | 13.70 | 0 | 0 | 0 | 0 | 0 | 0 | 0 | 1 | 0 | 1 | 0 | 0 | 0 | 1 | 0 | 0 | 0 | 1 |





|       |                                |                                                           |                                                  |            |            |            |      |    |       |   |   |   |   |   |   |   |   |   |   |   |   |   |   |   |   |   |   |
|-------|--------------------------------|-----------------------------------------------------------|--------------------------------------------------|------------|------------|------------|------|----|-------|---|---|---|---|---|---|---|---|---|---|---|---|---|---|---|---|---|---|
| 20449 | Docetaxel                      |                                                           |                                                  | Taxotere   | 7/27/1994  | 5/14/1996  | 1994 | 14 | 21.60 | 1 | 0 | 0 | 0 | 0 | 0 | 0 | 1 | 1 | 0 | 1 | 0 | 0 | 0 | 0 | 0 | 0 | 1 |
| 20941 | Docosanol                      | FDA has 12/22/1997 subdate                                |                                                  | Abreva     | 12/19/1997 | 7/25/2000  | 1997 | 17 | 31.63 | 0 | 0 | 0 | 0 | 0 | 0 | 0 | 0 | 1 | 0 | 0 | 0 | 0 | 0 | 0 | 0 | 0 | 1 |
| 20931 | Dofetilide                     |                                                           |                                                  | Tikosyn    | 3/9/1998   | 10/1/1999  | 1998 | 18 | 18.77 | 0 | 0 | 0 | 0 | 0 | 0 | 0 | 1 | 1 | 0 | 0 | 0 | 0 | 0 | 0 | 0 | 0 | 1 |
| 20623 | dolasetron mesilate            |                                                           |                                                  | ANZEMET    | 9/29/1995  | 9/11/1997  | 1995 | 15 | 23.44 | 0 | 0 | 0 | 0 | 0 | 0 | 0 | 1 | 1 | 0 | 0 | 0 | 0 | 0 | 0 | 0 | 0 | 1 |
| 20690 | donepezil hydrochloride        | FDA has 4/5/1996 subdate                                  |                                                  | ARICEPT    | 3/29/1996  | 11/25/1996 | 1996 | 16 | 7.92  | 1 | 0 | 0 | 0 | 0 | 0 | 0 | 0 | 1 | 0 | 1 | 0 | 0 | 0 | 0 | 0 | 0 | 1 |
| 20408 | Dorzolamide                    |                                                           |                                                  | Trusopt    | 12/10/1993 | 12/9/1994  | 1993 | 13 | 11.97 | 1 | 0 | 0 | 0 | 0 | 0 | 0 | 1 | 1 | 0 | 1 | 0 | 0 | 0 | 0 | 0 | 0 | 1 |
| 20862 | Doxercalciferol                | FDA has 3/9/1998 subdate                                  |                                                  | Hectorol   | 3/7/1998   | 6/9/1999   | 1998 | 18 | 15.09 | 0 | 0 | 0 | 0 | 0 | 0 | 0 | 0 | 1 | 0 | 0 | 0 | 0 | 0 | 0 | 0 | 0 | 1 |
| 21098 | Drospirenone/Ethinyl Estradiol | FDA has 5/17/1999 subdate                                 |                                                  | Yasmin     | 5/14/1999  | 5/11/2001  | 1999 | 19 | 24.27 | 0 | 0 | 0 | 0 | 0 | 0 | 0 | 0 | 1 | 0 | 0 | 0 | 0 | 0 | 0 | 0 | 0 | 1 |
| 21427 | Duloxetine Hydrochloride       |                                                           |                                                  | Cymbalta   | 11/12/2001 | 8/3/2004   | 2001 | 21 | 33.17 | 0 | 0 | 0 | 0 | 1 | 1 | 1 | 1 | 1 | 0 | 0 | 0 | 1 | 0 | 1 | 0 | 1 | 1 |
| 21319 | Dutasteride                    |                                                           |                                                  | Avodart    | 12/21/2000 | 11/20/2001 | 2000 | 20 | 11.13 | 0 | 0 | 0 | 0 | 0 | 0 | 0 | 1 | 1 | 0 | 0 | 0 | 0 | 0 | 0 | 0 | 0 | 1 |
| 20972 | Efavirenz                      |                                                           |                                                  | Sustiva    | 6/11/1998  | 9/17/1998  | 1998 | 18 | 3.22  | 1 | 0 | 0 | 0 | 0 | 0 | 0 | 1 | 1 | 0 | 1 | 0 | 0 | 0 | 0 | 0 | 0 | 1 |
| 21016 | Eletriptan Hydrobromide        |                                                           |                                                  | Relpax     | 10/27/1998 | 12/26/2002 | 1998 | 18 | 50.70 | 0 | 0 | 0 | 0 | 0 | 0 | 0 | 1 | 1 | 0 | 0 | 0 | 0 | 0 | 0 | 0 | 0 | 1 |
| 20706 | Emedastine Difumarate          |                                                           |                                                  | Emadine    | 3/26/1996  | 12/29/1997 | 1996 | 16 | 21.14 | 0 | 0 | 0 | 0 | 0 | 0 | 0 | 1 | 1 | 0 | 0 | 0 | 0 | 0 | 0 | 0 | 0 | 1 |
| 21500 | Emtricitabine                  | FDA does not have BBW; we have BBW                        | We code significant new information added to BBW | Emtriva    | 9/3/2002   | 7/2/2003   | 2002 | 22 | 10.07 | 0 | 1 | 1 | 0 | 1 | 1 | 1 | 0 | 1 | 1 | 0 | 0 | 0 | 0 | 0 | 0 | 0 | 1 |
| 21481 | Enfuvirtide                    | FDA has 9/16/02 subdate                                   |                                                  | Fuzcon     | 9/13/2002  | 3/13/2003  | 2002 | 22 | 6.03  | 1 | 1 | 1 | 0 | 0 | 0 | 0 | 0 | 1 | 1 | 1 | 0 | 0 | 0 | 0 | 0 | 0 | 1 |
| 20796 | Entacapone                     |                                                           |                                                  | Comtan     | 1/2/1998   | 10/19/1999 | 1998 | 18 | 21.53 | 0 | 0 | 0 | 0 | 0 | 0 | 0 | 1 | 1 | 0 | 0 | 0 | 0 | 0 | 0 | 0 | 0 | 1 |
| 21797 | Entecavir                      | FDA has no BBW; we have BBW; also FDA has 9/29/04 subdate | We code significant new information added to BBW | Baraclude  | 9/30/2004  | 3/29/2005  | 2004 | 24 | 6.00  | 1 | 1 | 1 | 0 | 1 | 0 | 1 | 0 | 1 | 1 | 1 | 0 | 0 | 0 | 0 | 0 | 0 | 1 |
| 21565 | Epinastine Hydrochloride       | FDA has 12/20/02 subdate                                  |                                                  | Elestat    | 12/19/2002 | 10/16/2003 | 2002 | 22 | 10.03 | 0 | 1 | 1 | 0 | 0 | 0 | 0 | 0 | 1 | 1 | 0 | 0 | 0 | 0 | 0 | 0 | 0 | 1 |
| 50778 | Epirubicin                     |                                                           |                                                  | Ellence    | 12/15/1998 | 9/15/1999  | 1998 | 18 | 9.01  | 1 | 0 | 0 | 0 | 0 | 0 | 0 | 1 | 1 | 0 | 1 | 0 | 0 | 0 | 0 | 0 | 0 | 1 |
| 21437 | Eplerenone                     | FDA has 11/29/01 subdate                                  |                                                  | Inspra     | 11/28/2001 | 9/27/2002  | 2001 | 21 | 10.10 | 0 | 1 | 1 | 0 | 0 | 0 | 0 | 0 | 1 | 1 | 0 | 0 | 0 | 0 | 0 | 0 | 0 | 1 |
| 20444 | Epoprostenol                   |                                                           |                                                  | Flolan     | 2/28/1994  | 9/20/1995  | 1994 | 14 | 18.71 | 1 | 0 | 0 | 0 | 0 | 0 | 0 | 1 | 1 | 0 | 1 | 0 | 0 | 0 | 0 | 0 | 0 | 1 |
| 20738 | Eprosartan Mesylate            |                                                           |                                                  | Teveten    | 10/11/1996 | 12/22/1997 | 1996 | 16 | 14.37 | 0 | 0 | 0 | 0 | 0 | 0 | 0 | 1 | 1 | 0 | 0 | 0 | 0 | 0 | 0 | 0 | 0 | 1 |
| 20718 | Eptifibatide                   |                                                           |                                                  | Integrilin | 4/2/1996   | 5/18/1998  | 1996 | 16 | 22.90 | 1 | 0 | 0 | 0 | 0 | 0 | 0 | 1 | 1 | 0 | 1 | 0 | 0 | 0 | 0 | 0 | 0 | 1 |

|       |                                  |                                                                                            |                                     |                      |            |            |      |    |       |   |   |   |   |   |   |   |   |   |   |   |   |   |   |   |   |   |   |   |
|-------|----------------------------------|--------------------------------------------------------------------------------------------|-------------------------------------|----------------------|------------|------------|------|----|-------|---|---|---|---|---|---|---|---|---|---|---|---|---|---|---|---|---|---|---|
| 21743 | Erlotinib Hydrochloride          | FDA has 7/30/04 subdate                                                                    |                                     | Tarceva              | 7/29/2004  | 11/18/2004 | 2004 | 24 | 3.73  | 1 | 0 | 0 | 0 | 0 | 0 | 0 | 0 | 1 | 0 | 1 | 0 | 0 | 0 | 0 | 0 | 0 | 0 | 1 |
| 21337 | Ertapenem Sodium                 |                                                                                            |                                     | Invanz               | 11/30/2000 | 11/21/2001 | 2000 | 20 | 11.87 | 0 | 0 | 0 | 0 | 0 | 0 | 0 | 0 | 1 | 1 | 0 | 0 | 0 | 0 | 0 | 0 | 0 | 0 | 1 |
| 21476 | Eszopiclone                      | FDA has 1/31/03 subdate                                                                    |                                     | Lunesta              | 1/20/2003  | 12/15/2004 | 2003 | 23 | 23.17 | 0 | 0 | 0 | 0 | 0 | 0 | 0 | 0 | 1 | 0 | 0 | 0 | 0 | 0 | 0 | 0 | 0 | 0 | 1 |
| 21187 | Ethinyl Estradiol/Etonogestrel   |                                                                                            |                                     | NuvaRing             | 12/28/1999 | 10/3/2001  | 1999 | 19 | 21.50 | 0 | 0 | 0 | 0 | 0 | 0 | 0 | 0 | 1 | 1 | 0 | 0 | 0 | 0 | 0 | 0 | 0 | 0 | 1 |
| 21180 | Ethinyl Estradiol/Norelgestromin |                                                                                            |                                     | Ortho Evra           | 12/21/2000 | 11/20/2001 | 2000 | 20 | 11.13 | 0 | 0 | 0 | 0 | 0 | 0 | 0 | 0 | 1 | 1 | 0 | 0 | 0 | 0 | 0 | 0 | 0 | 0 | 1 |
| 20753 | Exemestane                       | FDA has 12/21/98 subdate                                                                   |                                     | Aromasin             | 12/18/1998 | 10/21/1999 | 1998 | 18 | 10.09 | 0 | 1 | 1 | 0 | 0 | 0 | 0 | 0 | 1 | 1 | 0 | 0 | 0 | 0 | 0 | 0 | 0 | 0 | 1 |
| 21773 | Exenatide                        | FDA has 6/30/04 subdate                                                                    |                                     | Byetta               | 6/29/2004  | 4/28/2005  | 2004 | 24 | 10.10 | 0 | 1 | 1 | 0 | 0 | 0 | 0 | 0 | 1 | 1 | 0 | 0 | 0 | 0 | 0 | 0 | 0 | 0 | 1 |
| 21445 | Ezetimibe                        |                                                                                            |                                     | Zetia                | 12/27/2001 | 10/25/2002 | 2001 | 21 | 10.07 | 0 | 1 | 1 | 0 | 0 | 0 | 0 | 0 | 1 | 1 | 1 | 0 | 0 | 0 | 0 | 0 | 0 | 0 | 1 |
| 20363 | Famciclovir                      |                                                                                            |                                     | Famvir               | 6/30/1993  | 6/29/1994  | 1993 | 13 | 11.97 | 0 | 0 | 1 | 0 | 0 | 0 | 0 | 0 | 1 | 1 | 1 | 0 | 0 | 0 | 0 | 0 | 0 | 0 | 1 |
| 20416 | Ferumoxides                      | FDA has 2/7/1994 subdate                                                                   |                                     | Feridex              | 7/2/1994   | 8/30/1996  | 1994 | 14 | 25.97 | 0 | 0 | 0 | 0 | 0 | 0 | 0 | 0 | 1 | 0 | 0 | 0 | 0 | 0 | 0 | 0 | 0 | 0 | 1 |
| 20410 | Ferumoxsil                       |                                                                                            |                                     | Gastromark           | 11/23/1993 | 12/6/1996  | 1993 | 13 | 36.46 | 0 | 0 | 0 | 0 | 0 | 0 | 0 | 0 | 1 | 1 | 0 | 0 | 0 | 0 | 0 | 0 | 0 | 0 | 1 |
| 20625 | fexofenadine HCl                 |                                                                                            |                                     | ALLEGRA              | 7/31/1995  | 7/25/1996  | 1995 | 15 | 11.84 | 0 | 1 | 1 | 0 | 0 | 0 | 0 | 0 | 1 | 1 | 1 | 0 | 0 | 0 | 0 | 0 | 0 | 0 | 1 |
| 20306 | Fludeoxyglucose F 18             | Not in our data                                                                            |                                     | Fludeoxyglucose F 18 | 1/19/1993  | 8/19/1994  | 1993 | 13 | 19.00 | 1 | 0 | 0 | 0 | 0 | 0 | 0 | 0 | 1 | 0 | 1 | 0 | 0 | 0 | 0 | 0 | 0 | 0 | 0 |
| 20696 | Fomepizole                       |                                                                                            |                                     | Antizol              | 12/6/1996  | 12/4/1997  | 1996 | 16 | 11.93 | 0 | 1 | 1 | 0 | 0 | 0 | 0 | 0 | 1 | 1 | 1 | 0 | 0 | 0 | 0 | 0 | 0 | 0 | 1 |
| 20961 | Fomivirsen Sodium                |                                                                                            |                                     | Vitravenc            | 4/9/1998   | 8/26/1998  | 1998 | 18 | 4.57  | 1 | 1 | 1 | 0 | 0 | 0 | 0 | 0 | 1 | 1 | 1 | 1 | 0 | 0 | 0 | 0 | 0 | 0 | 1 |
| 21345 | Fondaparinux Sodium              | FDA has as priority; we originally had as standard; priority and predead have been recoded |                                     | Arixtra              | 2/15/2001  | 12/7/2001  | 2001 | 21 | 9.83  | 1 | 1 | 0 | 0 | 1 | 0 | 0 | 0 | 1 | 0 | 1 | 0 | 0 | 0 | 0 | 0 | 0 | 0 | 1 |
| 20831 | Formoterol Fumarate              | FDA has 6/26/1997 subdate                                                                  |                                     | Foradil Aerolizer    | 6/24/1997  | 2/16/2001  | 1997 | 17 | 44.43 | 0 | 0 | 0 | 0 | 0 | 0 | 0 | 0 | 1 | 0 | 0 | 0 | 0 | 0 | 0 | 0 | 0 | 0 | 1 |
| 50717 | Fosfomycin Tromethamine          |                                                                                            |                                     | Monurol              | 9/29/1994  | 12/19/1996 | 1994 | 14 | 26.70 | 0 | 0 | 0 | 0 | 0 | 0 | 0 | 0 | 1 | 1 | 0 | 0 | 0 | 0 | 0 | 0 | 0 | 0 | 1 |
| 20450 | Fosphenytoin Sodium              |                                                                                            |                                     | Cerebyx              | 2/23/1995  | 8/5/1996   | 1995 | 15 | 17.39 | 0 | 0 | 0 | 0 | 0 | 0 | 0 | 0 | 1 | 1 | 0 | 0 | 0 | 0 | 0 | 0 | 0 | 0 | 1 |
| 21006 | Frovatriptan                     |                                                                                            |                                     | Frova                | 1/29/1999  | 11/8/2001  | 1999 | 19 | 33.80 | 0 | 0 | 0 | 0 | 0 | 0 | 0 | 0 | 1 | 1 | 0 | 0 | 0 | 0 | 0 | 0 | 0 | 0 | 1 |
| 21344 | Fulvestrant                      |                                                                                            |                                     | Faslodex             | 3/28/2001  | 4/25/2002  | 2001 | 21 | 13.10 | 0 | 0 | 0 | 0 | 0 | 0 | 0 | 0 | 1 | 1 | 0 | 0 | 0 | 0 | 0 | 0 | 0 | 0 | 1 |
| 21357 | Gadobenate Dimeglumine           |                                                                                            |                                     | Multihance           | 4/27/2001  | 11/23/2004 | 2001 | 21 | 43.53 | 0 | 0 | 0 | 0 | 0 | 0 | 0 | 0 | 1 | 1 | 0 | 0 | 0 | 0 | 0 | 0 | 0 | 0 | 1 |
| 20937 | Gadoversetamide                  | FDA has BBW Sept 2007                                                                      | BBW added after CZA stopped coding; | OptiMark             | 3/2/1998   | 12/8/1999  | 1998 | 18 | 21.24 | 0 | 0 | 0 | 0 | 0 | 0 | 0 | 0 | 1 | 0 | 1 | 0 | 0 | 0 | 1 | 0 | 0 | 0 | 1 |



|       |                             |                                                        |                                                                                                                               |                    |            |            |      |    |       |   |   |   |   |   |   |   |   |   |   |   |   |   |   |   |   |   |   |
|-------|-----------------------------|--------------------------------------------------------|-------------------------------------------------------------------------------------------------------------------------------|--------------------|------------|------------|------|----|-------|---|---|---|---|---|---|---|---|---|---|---|---|---|---|---|---|---|---|
| 20367 | Imiglucerase                |                                                        |                                                                                                                               | Cerezyme           | 5/21/1993  | 5/23/1994  | 1993 | 13 | 12.07 | 1 | 0 | 0 | 0 | 0 | 0 | 0 | 1 | 1 | 0 | 1 | 0 | 0 | 0 | 0 | 0 | 0 | 1 |
| 20723 | Imiquimod                   |                                                        |                                                                                                                               | Aldara             | 7/26/1996  | 2/27/1997  | 1996 | 16 | 7.10  | 0 | 0 | 0 | 0 | 0 | 0 | 0 | 1 | 1 | 0 | 0 | 0 | 0 | 0 | 0 | 0 | 0 | 1 |
| 20685 | Indinavir Sulfate           |                                                        |                                                                                                                               | Crixivan           | 1/31/1996  | 3/13/1996  | 1996 | 16 | 1.38  | 1 | 0 | 0 | 0 | 0 | 0 | 0 | 1 | 1 | 0 | 1 | 0 | 0 | 0 | 0 | 0 | 0 | 1 |
| 20986 | Insulin Aspart Recombinant  | FDA has 9/16/1998 subdate                              |                                                                                                                               | NovoLog            | 9/15/1998  | 6/7/2000   | 1998 | 18 | 21.03 | 0 | 0 | 0 | 0 | 0 | 0 | 0 | 0 | 1 | 0 | 0 | 0 | 0 | 0 | 0 | 0 | 0 | 1 |
| 21536 | Insulin Detemir             |                                                        |                                                                                                                               | Levemir            | 12/5/2002  | 6/16/2005  | 2002 | 22 | 30.80 | 0 | 0 | 0 | 0 | 0 | 0 | 0 | 1 | 1 | 0 | 0 | 0 | 0 | 0 | 0 | 0 | 0 | 1 |
| 21081 | Insulin Glargine            | FDA has 4/23/99 subdate                                |                                                                                                                               | Lantus             | 4/9/1999   | 4/20/2000  | 1999 | 19 | 12.39 | 0 | 0 | 0 | 0 | 0 | 0 | 0 | 0 | 1 | 0 | 0 | 0 | 0 | 0 | 0 | 0 | 0 | 1 |
| 21629 | Insulin Glulisine           |                                                        |                                                                                                                               | Apidra             | 6/18/2003  | 4/16/2004  | 2003 | 23 | 10.10 | 0 | 1 | 1 | 0 | 0 | 0 | 0 | 1 | 1 | 1 | 0 | 0 | 0 | 0 | 0 | 0 | 0 | 1 |
| 20563 | Insulin Lispro              |                                                        |                                                                                                                               | Humalog            | 3/14/1995  | 6/14/1996  | 1995 | 15 | 15.06 | 0 | 0 | 0 | 0 | 0 | 0 | 0 | 1 | 1 | 0 | 0 | 0 | 0 | 0 | 0 | 0 | 0 | 1 |
| 20587 | Intraleural Aerosol         |                                                        |                                                                                                                               | Sclerosol          | 8/15/1995  | 12/24/1997 | 1995 | 15 | 28.34 | 1 | 0 | 0 | 0 | 0 | 0 | 0 | 1 | 1 | 0 | 1 | 0 | 0 | 0 | 0 | 0 | 0 | 1 |
| 20351 | Iodixanol                   |                                                        |                                                                                                                               | Visipaque 270, 320 | 3/5/1993   | 3/22/1996  | 1993 | 13 | 36.59 | 0 | 0 | 0 | 0 | 0 | 0 | 0 | 1 | 1 | 0 | 0 | 0 | 0 | 0 | 0 | 0 | 0 | 1 |
| 20757 | Irbesartan                  | FDA has as not predead; falls within our two week rule |                                                                                                                               | Avapro             | 9/26/1996  | 9/30/1997  | 1996 | 16 | 12.13 | 0 | 1 | 1 | 0 | 0 | 0 | 0 | 0 | 1 | 0 | 0 | 0 | 0 | 0 | 0 | 0 | 0 | 1 |
| 20571 | Irinotecan Hydrochloride    |                                                        |                                                                                                                               | Camptosar          | 12/28/1995 | 6/14/1996  | 1995 | 15 | 5.56  | 1 | 1 | 1 | 0 | 0 | 0 | 0 | 1 | 1 | 1 | 1 | 0 | 0 | 0 | 0 | 0 | 0 | 1 |
| 50742 | Ivermectin                  |                                                        |                                                                                                                               | Stromectol         | 4/1/1996   | 11/22/1996 | 1996 | 16 | 7.73  | 1 | 0 | 0 | 0 | 0 | 0 | 0 | 1 | 1 | 0 | 1 | 0 | 0 | 0 | 0 | 0 | 0 | 1 |
| 21066 | Ketotifen fumarate          |                                                        |                                                                                                                               | Zaditor            | 1/4/1999   | 7/2/1999   | 1999 | 19 | 5.88  | 1 | 1 | 1 | 0 | 0 | 0 | 0 | 1 | 1 | 1 | 1 | 0 | 0 | 0 | 0 | 0 | 0 | 1 |
| 20564 | Lamivudine                  | FDA has BBW 15-Dec-97; FDA also has as predeadline     |                                                                                                                               | Epivir             | 7/7/1995   | 11/17/1995 | 1995 | 15 | 4.37  | 1 | 0 | 0 | 0 | 0 | 1 | 1 | 0 | 1 | 1 | 1 | 0 | 1 | 0 | 1 | 0 | 1 | 1 |
| 20406 | Lansoprazole                |                                                        |                                                                                                                               | Prevacid           | 11/15/1993 | 5/10/1995  | 1993 | 13 | 17.79 | 0 | 0 | 0 | 0 | 0 | 0 | 0 | 1 | 1 | 0 | 0 | 0 | 0 | 0 | 0 | 0 | 0 | 1 |
| 21468 | Lanthanum Carbonate Hydrate |                                                        |                                                                                                                               | Fosrenol           | 4/30/2002  | 10/26/2004 | 2002 | 22 | 30.33 | 0 | 0 | 0 | 0 | 0 | 0 | 0 | 1 | 1 | 0 | 0 | 0 | 0 | 0 | 0 | 0 | 0 | 1 |
| 20597 | Latanoprost                 |                                                        |                                                                                                                               | Xalatan            | 6/16/1995  | 6/5/1996   | 1995 | 15 | 11.67 | 1 | 0 | 0 | 0 | 0 | 0 | 0 | 1 | 1 | 0 | 1 | 0 | 0 | 0 | 0 | 0 | 0 | 1 |
| 20905 | Leflunomide                 |                                                        |                                                                                                                               | Arava              | 3/10/1998  | 9/10/1998  | 1998 | 18 | 6.05  | 1 | 1 | 1 | 0 | 0 | 0 | 0 | 1 | 1 | 1 | 1 | 0 | 0 | 0 | 0 | 0 | 0 | 1 |
| 20807 | Lepirudin                   |                                                        |                                                                                                                               | Refludan           | 12/31/1996 | 3/6/1998   | 1996 | 16 | 14.14 | 1 | 0 | 0 | 0 | 0 | 0 | 0 | 1 | 1 | 0 | 1 | 0 | 0 | 0 | 0 | 0 | 0 | 1 |
| 20726 | Letrozole                   |                                                        |                                                                                                                               | Femara             | 7/25/1996  | 7/25/1997  | 1996 | 16 | 12.00 | 0 | 1 | 1 | 0 | 0 | 0 | 0 | 1 | 1 | 1 | 0 | 0 | 0 | 0 | 0 | 0 | 0 | 1 |
| 21035 | Levetiracetam               |                                                        |                                                                                                                               | Keppra             | 2/1/1999   | 11/30/1999 | 1999 | 19 | 9.93  | 0 | 1 | 1 | 0 | 0 | 0 | 0 | 1 | 1 | 1 | 0 | 0 | 0 | 0 | 0 | 0 | 0 | 1 |
| 20315 | Levomethadyl acetate        | FDA has SBW in Aug 2003                                | Discrepancy with other FDA data; FDA does not list this as withdrawal in 2004 publications and in data given to Berndt et al. | Orlaam             | 6/21/1993  | 7/9/1993   | 1993 | 13 | 0.59  | 1 | 0 | 0 | 0 | 0 | 0 | 0 | 0 | 1 | 0 | 1 | 1 | 0 | 1 | 0 | 1 | 0 | 1 |

|       |                                |                                                           |                                                          |                                |            |            |      |    |       |   |   |   |   |   |   |   |   |   |   |   |   |   |   |   |   |   |   |   |
|-------|--------------------------------|-----------------------------------------------------------|----------------------------------------------------------|--------------------------------|------------|------------|------|----|-------|---|---|---|---|---|---|---|---|---|---|---|---|---|---|---|---|---|---|---|
| 21667 | L-Glutamine                    | FDA has 8/11/03 subdate                                   |                                                          | NutreStore                     | 8/8/2003   | 6/10/2004  | 2003 | 23 | 10.23 | 0 | 1 | 1 | 0 | 0 | 0 | 0 | 0 | 1 | 1 | 0 | 0 | 0 | 0 | 0 | 0 | 0 | 1 |   |
| 21130 | Linezolid                      | FDA has 10/18/1999 subdate                                |                                                          | Zyvox                          | 10/15/1999 | 4/18/2000  | 1999 | 19 | 6.12  | 1 | 1 | 1 | 0 | 0 | 0 | 0 | 0 | 1 | 1 | 1 | 0 | 0 | 0 | 0 | 0 | 0 | 1 |   |
| 21226 | Lopinavir;Ritonavir            | FDA has 6/01/00 subdate                                   |                                                          | Kaletra                        | 5/31/2000  | 9/15/2000  | 2000 | 20 | 3.57  | 1 | 0 | 0 | 0 | 0 | 0 | 0 | 0 | 1 | 0 | 1 | 0 | 0 | 0 | 0 | 0 | 0 | 1 |   |
| 20386 | Losartan potassium             |                                                           |                                                          | Cozaar                         | 12/3/1993  | 4/14/1995  | 1993 | 13 | 16.34 | 0 | 0 | 0 | 0 | 0 | 0 | 0 | 0 | 1 | 1 | 0 | 0 | 0 | 0 | 0 | 0 | 0 | 1 |   |
| 20583 | Loteprednol Etabonate          |                                                           |                                                          | LOTEMAX                        | 3/31/1995  | 3/9/1998   | 1995 | 15 | 35.31 | 0 | 0 | 0 | 0 | 0 | 0 | 0 | 0 | 1 | 1 | 0 | 0 | 0 | 0 | 0 | 0 | 0 | 1 |   |
| 20652 | Mangafodipir Trisodium         | FDA has 9/15/1995 subdate                                 |                                                          | Teslascan                      | 9/8/1995   | 11/26/1997 | 1995 | 15 | 26.63 | 0 | 0 | 0 | 0 | 0 | 0 | 0 | 0 | 1 | 0 | 0 | 0 | 0 | 0 | 0 | 0 | 0 | 1 |   |
| 20938 | Meloxicam                      | FDA has BBW 11-August-2005; FDA also has 12/16/98 subdate | BBW added after CZA stopped coding.                      | Mobic                          | 12/15/1998 | 4/13/2000  | 1998 | 18 | 16.17 | 0 | 0 | 0 | 0 | 0 | 0 | 0 | 1 | 0 | 1 | 0 | 0 | 0 | 0 | 1 | 0 | 0 | 1 |   |
| 21487 | Memantine Hydrochloride        |                                                           |                                                          | Namenda                        | 12/19/2002 | 10/16/2003 | 2002 | 22 | 10.05 | 0 | 1 | 1 | 0 | 0 | 0 | 0 | 0 | 1 | 1 | 1 | 0 | 0 | 0 | 0 | 0 | 0 | 1 |   |
| 20922 | Mequinol                       |                                                           |                                                          | Solage                         | 12/30/1997 | 12/10/1999 | 1997 | 17 | 23.34 | 0 | 0 | 0 | 0 | 0 | 0 | 0 | 0 | 1 | 1 | 0 | 0 | 0 | 0 | 0 | 0 | 0 | 1 |   |
| 20586 | MERETEK UBT KIT (W/ PRANACTIN) |                                                           |                                                          | MERETEK UBT KIT (W/ PRANACTIN) | 5/11/1995  | 9/17/1996  | 1995 | 15 | 16.27 | 0 | 0 | 0 | 0 | 0 | 0 | 0 | 0 | 1 | 1 | 0 | 0 | 0 | 0 | 0 | 0 | 0 | 1 |   |
| 50706 | Meropenem                      | FDA has 10/30/1993 subdate                                |                                                          | Merrem I.V.                    | 10/28/1993 | 6/21/1996  | 1993 | 13 | 31.79 | 0 | 0 | 0 | 0 | 0 | 0 | 0 | 0 | 0 | 1 | 0 | 0 | 0 | 0 | 0 | 0 | 0 | 1 |   |
| 40306 | METADATE ER                    | Not in FDA data; may not be NME                           |                                                          | METADATE ER                    | 4/13/1998  | 10/20/1999 | 1998 | 18 | 18.25 | 0 | 0 | 0 | 0 | 0 | 0 | 0 | 0 | 0 | 0 | 0 | 0 | 0 | 0 | 0 | 0 | 0 | 1 |   |
| 20689 | Mibefradil Dihydrochloride     |                                                           | Discrepancy in FDA data; not listed on Drugs@FDA website | Posicor                        | 3/11/1996  | 6/20/1997  | 1996 | 16 | 15.32 | 0 | 0 | 0 | 1 | 0 | 0 | 0 | 0 | 1 | 1 | 0 | 0 | 1 | 0 | 1 | 0 | 1 | 0 | 1 |
| 21506 | Micafungin Sodium              |                                                           |                                                          | Mycamine                       | 4/29/2002  | 3/16/2005  | 2002 | 22 | 35.07 | 1 | 0 | 0 | 0 | 0 | 0 | 0 | 0 | 1 | 1 | 0 | 1 | 0 | 0 | 0 | 0 | 0 | 1 |   |
| 20687 | Mifepristone                   | FDA has 3/18/1996 subdate                                 |                                                          | Mifeprex                       | 3/14/1996  | 9/28/2000  | 1996 | 16 | 55.30 | 1 | 0 | 0 | 0 | 0 | 0 | 0 | 0 | 0 | 1 | 0 | 1 | 0 | 0 | 0 | 0 | 0 | 1 |   |
| 20682 | Miglitol                       |                                                           |                                                          | Glyset                         | 12/29/1995 | 12/18/1996 | 1995 | 15 | 11.67 | 0 | 1 | 1 | 0 | 0 | 0 | 0 | 0 | 1 | 1 | 1 | 0 | 0 | 0 | 0 | 0 | 0 | 1 |   |
| 21348 | Miglustat                      | FDA has 4/21/2001 subdate                                 |                                                          | Zavesca                        | 4/20/2001  | 7/31/2003  | 2001 | 21 | 27.73 | 0 | 0 | 0 | 0 | 0 | 0 | 0 | 0 | 0 | 1 | 0 | 0 | 0 | 0 | 0 | 0 | 0 | 1 |   |
| 20415 | Mirtazapine                    | FDA has BBW 12-Jan-2005                                   | CZA omission; therapeutic class relabeling               | Remeron                        | 1/30/1995  | 6/14/1996  | 1995 | 15 | 16.47 | 0 | 0 | 0 | 0 | 0 | 0 | 1 | 1 | 0 | 1 | 0 | 0 | 0 | 1 | 0 | 1 | 0 | 1 |   |
| 20717 | Modafinil                      |                                                           |                                                          | Provigil                       | 12/30/1996 | 12/24/1998 | 1996 | 16 | 23.80 | 0 | 0 | 0 | 0 | 0 | 0 | 0 | 0 | 1 | 1 | 0 | 0 | 0 | 0 | 0 | 0 | 0 | 1 |   |
| 20829 | Montelukast Sodium             |                                                           |                                                          | Singulair                      | 2/21/1997  | 2/20/1998  | 1997 | 17 | 11.97 | 0 | 1 | 1 | 0 | 0 | 0 | 0 | 0 | 1 | 1 | 1 | 0 | 0 | 0 | 0 | 0 | 0 | 1 |   |

|       |                           |                                                               |                                                                                                                                                     |           |            |            |      |    |       |   |   |   |   |   |   |   |   |   |   |   |   |   |   |   |   |   |   |
|-------|---------------------------|---------------------------------------------------------------|-----------------------------------------------------------------------------------------------------------------------------------------------------|-----------|------------|------------|------|----|-------|---|---|---|---|---|---|---|---|---|---|---|---|---|---|---|---|---|---|
| 21085 | Moxifloxacin              |                                                               |                                                                                                                                                     | Avelox    | 12/10/1998 | 12/10/1999 | 1998 | 18 | 12.00 | 0 | 0 | 0 | 0 | 0 | 0 | 0 | 1 | 1 | 0 | 0 | 0 | 0 | 0 | 0 | 0 | 0 | 1 |
| 50722 | Mycophenolate mofetil     |                                                               |                                                                                                                                                     | Cellcept  | 11/10/1994 | 5/3/1995   | 1994 | 14 | 5.72  | 1 | 1 | 1 | 0 | 0 | 0 | 0 | 1 | 1 | 1 | 1 | 0 | 0 | 0 | 0 | 0 | 0 | 1 |
| 20459 | Nalmefene                 |                                                               |                                                                                                                                                     | Revox     | 4/29/1994  | 4/17/1995  | 1994 | 14 | 11.61 | 0 | 0 | 1 | 0 | 0 | 0 | 0 | 1 | 1 | 1 | 0 | 0 | 0 | 0 | 0 | 0 | 0 | 1 |
| 20763 | Naratriptan               |                                                               |                                                                                                                                                     | Amerge    | 12/4/1996  | 2/10/1998  | 1996 | 16 | 14.24 | 0 | 0 | 0 | 0 | 0 | 0 | 0 | 1 | 1 | 0 | 0 | 0 | 0 | 0 | 0 | 0 | 0 | 1 |
| 21204 | Nateglinide               |                                                               |                                                                                                                                                     | Starlix   | 12/17/1999 | 12/22/2000 | 1999 | 19 | 12.37 | 0 | 0 | 0 | 0 | 0 | 0 | 0 | 1 | 1 | 0 | 0 | 0 | 0 | 0 | 0 | 0 | 0 | 1 |
| 20779 | Nelfinavir Mesylate       | FDA has subdate of 12/26/96                                   |                                                                                                                                                     | Viracept  | 12/20/1996 | 3/14/1997  | 1996 | 16 | 2.76  | 1 | 0 | 0 | 0 | 0 | 0 | 0 | 0 | 1 | 0 | 1 | 0 | 0 | 0 | 0 | 0 | 0 | 1 |
| 20920 | Nesiritide                | FDA has 4/27/1998 subdate                                     |                                                                                                                                                     | Natrecor  | 4/24/1998  | 8/10/2001  | 1998 | 18 | 40.13 | 0 | 0 | 0 | 0 | 0 | 0 | 0 | 0 | 1 | 0 | 0 | 0 | 0 | 0 | 0 | 0 | 0 | 1 |
| 20636 | Nevirapine                |                                                               |                                                                                                                                                     | Viramune  | 2/23/1996  | 6/21/1996  | 1996 | 16 | 3.91  | 1 | 0 | 0 | 0 | 0 | 0 | 0 | 1 | 1 | 0 | 1 | 0 | 0 | 0 | 0 | 0 | 0 | 1 |
| 20169 | Nilutamide                | FDA has BBW 29-Sep-2000                                       | Nilutamide had BBW from the start, addition was arguably not significant; see Bennett et al, AnnalsIM, 16 September 2003, Volume 139 Issue 6, p 529 | Nilandron | 3/7/1994   | 9/19/1996  | 1994 | 14 | 30.48 | 0 | 0 | 0 | 0 | 0 | 1 | 1 | 0 | 1 | 0 | 0 | 0 | 1 | 0 | 1 | 0 | 1 | 1 |
| 20356 | Nisoldipine               |                                                               |                                                                                                                                                     | Sular     | 4/1/1993   | 2/2/1995   | 1993 | 13 | 22.09 | 0 | 0 | 0 | 0 | 0 | 0 | 0 | 1 | 1 | 0 | 0 | 0 | 0 | 0 | 0 | 0 | 0 | 1 |
| 21498 | Nitazoxanide              |                                                               |                                                                                                                                                     | Alinia    | 5/29/2002  | 11/22/2002 | 2002 | 22 | 5.90  | 1 | 1 | 1 | 0 | 0 | 0 | 0 | 1 | 1 | 1 | 1 | 0 | 0 | 0 | 0 | 0 | 0 | 1 |
| 21232 | Nitisinone                | FDA has 9/8/2000 subdate                                      |                                                                                                                                                     | Orfadin   | 12/27/1999 | 1/18/2002  | 1999 | 19 | 25.10 | 1 | 0 | 0 | 0 | 0 | 0 | 0 | 0 | 1 | 0 | 1 | 0 | 0 | 0 | 0 | 0 | 0 | 1 |
| 20845 | Nitric oxide              |                                                               |                                                                                                                                                     | INOmax    | 6/16/1997  | 12/23/1999 | 1997 | 17 | 30.25 | 1 | 0 | 0 | 0 | 0 | 0 | 0 | 1 | 1 | 0 | 1 | 0 | 0 | 0 | 0 | 0 | 0 | 1 |
| 20592 | Olanzapine                | We have this as predead; FDA does not; FDA also has BBW Feb06 | BBW added after CZA stopped coding. BBW is therapeutic class relabeling for atypical antipsychotics                                                 | Zyprexa   | 9/22/1995  | 9/30/1996  | 1995 | 15 | 12.30 | 0 | 1 | 1 | 0 | 0 | 0 | 1 | 0 | 1 | 0 | 0 | 0 | 1 | 0 | 0 | 0 | 0 | 1 |
| 21286 | Olmесartan Medoxomil      |                                                               |                                                                                                                                                     | Benicar   | 7/25/2000  | 4/25/2002  | 2000 | 20 | 21.30 | 0 | 0 | 0 | 0 | 0 | 0 | 0 | 1 | 1 | 0 | 0 | 0 | 0 | 0 | 0 | 0 | 0 | 1 |
| 20688 | Olopatadine Hydrochloride | FDA has 1/29/96 subdate                                       |                                                                                                                                                     | Patanol   | 1/19/1996  | 12/18/1996 | 1996 | 16 | 10.98 | 0 | 1 | 1 | 0 | 0 | 0 | 0 | 0 | 1 | 1 | 0 | 0 | 0 | 0 | 0 | 0 | 0 | 1 |
| 21654 | Omega-3-acid Ethyl Esters | FDA has 1/12/04 subdate                                       |                                                                                                                                                     | Omacor    | 1/9/2004   | 11/10/2004 | 2004 | 24 | 10.20 | 0 | 1 | 1 | 0 | 0 | 0 | 0 | 0 | 1 | 1 | 0 | 0 | 0 | 0 | 0 | 0 | 0 | 1 |
| 20766 | Orlistat                  | FDA has 11/27/1996 subdate                                    |                                                                                                                                                     | Xenical   | 11/26/1996 | 4/23/1999  | 1996 | 16 | 28.87 | 1 | 0 | 0 | 0 | 0 | 0 | 0 | 0 | 1 | 0 | 1 | 0 | 0 | 0 | 0 | 0 | 0 | 1 |



|       |                             |                                                                                                              |                                                                                                     |              |            |            |      |    |       |   |   |   |   |   |   |   |   |   |   |   |   |   |   |   |   |   |   |
|-------|-----------------------------|--------------------------------------------------------------------------------------------------------------|-----------------------------------------------------------------------------------------------------|--------------|------------|------------|------|----|-------|---|---|---|---|---|---|---|---|---|---|---|---|---|---|---|---|---|---|
| 20451 | Porfimer                    |                                                                                                              |                                                                                                     | Photofrin    | 4/13/1994  | 12/27/1995 | 1994 | 14 | 20.48 | 1 | 0 | 0 | 0 | 0 | 0 | 0 | 1 | 1 | 0 | 1 | 0 | 0 | 0 | 0 | 0 | 0 | 1 |
| 20667 | Pramipexole Dihydrochloride | FDA has 12/28/1995 subdate                                                                                   |                                                                                                     | Mirapex      | 12/26/1995 | 7/1/1997   | 1995 | 15 | 18.18 | 0 | 0 | 0 | 0 | 0 | 0 | 0 | 0 | 1 | 0 | 0 | 0 | 0 | 0 | 0 | 0 | 0 | 1 |
| 21332 | Pramlintide Acetate         | FDA has 12/8/2000 subdate                                                                                    |                                                                                                     | Symlin       | 12/7/2000  | 3/16/2005  | 2000 | 20 | 52.00 | 0 | 0 | 0 | 0 | 0 | 0 | 0 | 0 | 1 | 0 | 0 | 0 | 0 | 0 | 0 | 0 | 0 | 1 |
| 21446 | Pregabalin                  | FDA has 10/31/03 subdate                                                                                     |                                                                                                     | Lyrica       | 10/30/2003 | 12/30/2004 | 2003 | 23 | 14.23 | 1 | 0 | 0 | 0 | 0 | 0 | 0 | 0 | 1 | 0 | 1 | 0 | 0 | 0 | 0 | 0 | 0 | 1 |
| 21626 | Prussian Blue               | FDA has as no predead approval; this may be coding error on our part                                         |                                                                                                     | Radiogardase | 3/10/2003  | 10/2/2003  | 2003 | 23 | 6.87  | 1 | 1 | 0 | 0 | 0 | 0 | 0 | 0 | 1 | 0 | 1 | 0 | 0 | 0 | 0 | 0 | 0 | 1 |
| 20639 | Quetiapine Fumarate         | FDA has BBW Feb 2007                                                                                         | BBW added after CZA stopped coding; BBW is therapeutic class relabeling for atypical antipsychotics | Seroquel     | 7/29/1996  | 9/26/1997  | 1996 | 16 | 13.94 | 0 | 0 | 0 | 0 | 0 | 0 | 1 | 0 | 1 | 0 | 0 | 0 | 1 | 0 | 0 | 0 | 0 | 1 |
| 50748 | Quinupristin/dalfopristin   | FDA has as priority; FDA has NDA # 50747                                                                     |                                                                                                     | Synercid     | 9/5/1997   | 9/21/1999  | 1997 | 17 | 24.53 | 1 | 0 | 0 | 0 | 0 | 0 | 0 | 0 | 1 | 0 | 1 | 0 | 0 | 0 | 0 | 0 | 0 | 1 |
| 20973 | Rabeprazole sodium          |                                                                                                              |                                                                                                     | Aciphex      | 3/31/1998  | 8/19/1999  | 1998 | 18 | 16.64 | 0 | 0 | 0 | 0 | 0 | 0 | 0 | 1 | 1 | 0 | 0 | 0 | 0 | 0 | 0 | 0 | 0 | 1 |
| 20815 | Raloxifene Hydrochloride    | FDA has BBW added Sep 07                                                                                     | BBW added after CZA stopped coding                                                                  | Evista       | 6/9/1997   | 12/9/1997  | 1997 | 17 | 6.02  | 1 | 1 | 1 | 0 | 0 | 0 | 1 | 0 | 1 | 1 | 1 | 0 | 1 | 0 | 0 | 0 | 0 | 1 |
| 21782 | Ramelteon                   | Not in our data                                                                                              |                                                                                                     | Rozerem      | 9/22/2004  | 7/22/2005  | 2004 | 24 | 10.00 | 0 | 1 | 1 | 0 | 0 | 0 | 0 | 0 | 1 | 1 | 0 | 0 | 0 | 0 | 0 | 0 | 0 | 0 |
| 20984 | Rapacuronium bromide        |                                                                                                              |                                                                                                     | Raplon       | 6/25/1998  | 8/18/1999  | 1998 | 18 | 13.78 | 0 | 0 | 0 | 1 | 0 | 0 | 0 | 0 | 1 | 1 | 0 | 0 | 1 | 0 | 1 | 0 | 1 | 0 |
| 20630 | Remifentanyl Hydrochloride  |                                                                                                              |                                                                                                     | Ultiva       | 9/15/1995  | 7/12/1996  | 1995 | 15 | 9.90  | 0 | 0 | 0 | 0 | 0 | 0 | 0 | 1 | 1 | 0 | 0 | 0 | 0 | 0 | 0 | 0 | 0 | 1 |
| 20741 | Repaglinide                 |                                                                                                              |                                                                                                     | Prandin      | 7/1/1997   | 12/22/1997 | 1997 | 17 | 5.72  | 1 | 1 | 1 | 0 | 0 | 0 | 0 | 0 | 1 | 1 | 1 | 1 | 0 | 0 | 0 | 0 | 0 | 1 |
| 21024 | Rifapentine                 |                                                                                                              |                                                                                                     | Priftin      | 12/22/1997 | 6/22/1998  | 1997 | 17 | 5.98  | 1 | 1 | 1 | 0 | 0 | 0 | 0 | 0 | 1 | 1 | 1 | 1 | 0 | 0 | 0 | 0 | 0 | 1 |
| 21361 | Rifaximin                   | FDA has 12/26/2001 subdate                                                                                   |                                                                                                     | Xifaxan      | 12/21/2001 | 5/25/2004  | 2001 | 21 | 29.53 | 0 | 0 | 0 | 0 | 0 | 0 | 0 | 0 | 1 | 0 | 0 | 0 | 0 | 0 | 0 | 0 | 0 | 1 |
| 20599 | Riluzole                    | Our original predead code was 0; think this was also coded standard; FDA has not as predead, b/c of 2 cycles |                                                                                                     | Rilutek      | 6/29/1995  | 12/12/1995 | 1995 | 15 | 5.46  | 1 | 0 | 1 | 0 | 0 | 0 | 0 | 0 | 0 | 1 | 0 | 1 | 0 | 0 | 0 | 0 | 0 | 1 |
| 20474 | Rimexolone                  |                                                                                                              |                                                                                                     | Vexol        | 6/1/1994   | 12/30/1994 | 1994 | 14 | 6.97  | 1 | 0 | 0 | 0 | 0 | 0 | 0 | 0 | 1 | 1 | 0 | 1 | 0 | 0 | 0 | 0 | 0 | 1 |
| 20835 | Risedronate Sodium          |                                                                                                              |                                                                                                     | Actonel      | 4/1/1997   | 3/27/1998  | 1997 | 17 | 11.84 | 0 | 1 | 1 | 0 | 0 | 0 | 0 | 0 | 1 | 1 | 1 | 0 | 0 | 0 | 0 | 0 | 0 | 1 |
| 20659 | Ritonavir                   |                                                                                                              |                                                                                                     | Norvir       | 12/21/1995 | 3/1/1996   | 1995 | 15 | 2.33  | 1 | 0 | 0 | 0 | 0 | 0 | 0 | 0 | 1 | 1 | 0 | 1 | 0 | 0 | 0 | 0 | 0 | 1 |
| 20823 | Rivastigmine Tartrate       |                                                                                                              |                                                                                                     | Exelon       | 4/7/1997   | 4/21/2000  | 1997 | 17 | 37.00 | 0 | 0 | 0 | 0 | 0 | 0 | 0 | 0 | 1 | 1 | 0 | 0 | 0 | 0 | 0 | 0 | 0 | 1 |
| 20864 | Rizatriptan Benzoate        |                                                                                                              |                                                                                                     | Maxalt       | 6/30/1997  | 6/29/1998  | 1997 | 17 | 11.97 | 0 | 1 | 1 | 0 | 0 | 0 | 0 | 0 | 1 | 1 | 1 | 0 | 0 | 0 | 0 | 0 | 0 | 1 |
| 20214 | Rocuronium bromide          |                                                                                                              |                                                                                                     | Zemuron      | 6/29/1993  | 3/17/1994  | 1993 | 13 | 8.58  | 0 | 0 | 0 | 0 | 0 | 0 | 0 | 0 | 1 | 1 | 0 | 0 | 0 | 0 | 0 | 0 | 0 | 1 |
| 21042 | Rofecoxib                   |                                                                                                              |                                                                                                     | Vioxx        | 11/23/1998 | 5/20/1999  | 1998 | 18 | 5.85  | 1 | 1 | 1 | 1 | 0 | 0 | 0 | 0 | 1 | 1 | 1 | 1 | 1 | 0 | 1 | 0 | 1 | 1 |



|       |                                   |                                                             |                                                                                           |                    |            |            |      |    |       |   |   |   |   |   |   |   |   |   |   |   |   |   |   |   |   |   |   |
|-------|-----------------------------------|-------------------------------------------------------------|-------------------------------------------------------------------------------------------|--------------------|------------|------------|------|----|-------|---|---|---|---|---|---|---|---|---|---|---|---|---|---|---|---|---|---|
| 20887 | Technetium tc 99m Apcitide        | FDA has 8/20/97 subdate                                     |                                                                                           | AcuTect            | 8/19/1997  | 9/14/1998  | 1997 | 17 | 12.85 | 1 | 0 | 0 | 0 | 0 | 0 | 0 | 0 | 1 | 0 | 1 | 0 | 0 | 0 | 0 | 0 | 0 | 1 |
| 21012 | Technetium tc 99m depreotide      |                                                             |                                                                                           | NeoTect            | 6/16/1998  | 8/3/1999   | 1998 | 18 | 13.58 | 1 | 0 | 0 | 0 | 0 | 0 | 0 | 1 | 1 | 0 | 1 | 0 | 0 | 0 | 0 | 0 | 0 | 1 |
| 20372 | Technetium Tc-99m Tetrofosmin Kit |                                                             |                                                                                           | Myoview            | 6/7/1993   | 2/9/1996   | 1993 | 13 | 32.12 | 0 | 0 | 0 | 0 | 0 | 0 | 0 | 1 | 1 | 0 | 0 | 0 | 0 | 0 | 0 | 0 | 0 | 1 |
| 21200 | Tegaserod Maleate                 | FDA has SBW March 2007                                      | SBW after CZA stopped coding                                                              | Zelnorm            | 2/11/2000  | 7/24/2002  | 2000 | 20 | 29.80 | 1 | 0 | 0 | 0 | 0 | 0 | 0 | 0 | 1 | 0 | 1 | 1 | 0 | 0 | 0 | 0 | 0 | 1 |
| 21144 | Telithromycin                     | FDA has BBW Feb 2007; FDA also has March 1, 2000 subdate    | BBW added after CZA stopped coding                                                        | Ketek              | 2/28/2000  | 4/1/2004   | 2000 | 20 | 49.80 | 0 | 0 | 0 | 0 | 0 | 0 | 1 | 0 | 1 | 0 | 0 | 0 | 1 | 0 | 0 | 0 | 0 | 1 |
| 20850 | Telmisartan                       |                                                             |                                                                                           | Micardis           | 9/26/1997  | 11/10/1998 | 1997 | 17 | 13.48 | 0 | 0 | 0 | 0 | 0 | 0 | 0 | 1 | 1 | 0 | 0 | 0 | 0 | 0 | 0 | 0 | 0 | 1 |
| 21029 | Temozolomide                      | FDA has 8/13/1998 subdate                                   |                                                                                           | Temodar            | 8/12/1998  | 8/11/1999  | 1998 | 18 | 11.97 | 1 | 0 | 0 | 0 | 0 | 0 | 0 | 0 | 1 | 0 | 1 | 0 | 0 | 0 | 0 | 0 | 0 | 1 |
| 21356 | Tenofovir Disoproxil Fumarate     | FDA has 5/1/01 subdate                                      | We code significant new information added to BBW                                          | Viread             | 4/30/2001  | 10/26/2001 | 2001 | 21 | 5.97  | 1 | 1 | 1 | 0 | 1 | 1 | 1 | 0 | 1 | 1 | 1 | 0 | 0 | 0 | 0 | 0 | 0 | 1 |
| 20785 | Thalidomide                       |                                                             |                                                                                           | Thalomid           | 12/20/1996 | 7/16/1998  | 1996 | 16 | 18.84 | 1 | 0 | 0 | 0 | 0 | 0 | 0 | 1 | 1 | 0 | 1 | 0 | 0 | 0 | 0 | 0 | 0 | 1 |
| 20898 | Thyrotropin Alfa                  | FDA has 12/15/97 subdate                                    |                                                                                           | Thyrogen           | 12/12/1997 | 11/30/1998 | 1997 | 17 | 11.61 | 1 | 0 | 0 | 0 | 0 | 0 | 0 | 0 | 1 | 0 | 1 | 0 | 0 | 0 | 0 | 0 | 0 | 1 |
| 20646 | Tiagabine Hydrochloride           |                                                             |                                                                                           | Gabitril           | 11/6/1995  | 9/30/1997  | 1995 | 15 | 22.82 | 0 | 0 | 0 | 0 | 0 | 0 | 0 | 1 | 1 | 0 | 0 | 0 | 0 | 0 | 0 | 0 | 0 | 1 |
| 21821 | Tigecycline                       |                                                             |                                                                                           | Tygacil            | 12/15/2004 | 6/15/2005  | 2004 | 24 | 6.07  | 1 | 1 | 1 | 0 | 0 | 0 | 0 | 0 | 1 | 1 | 1 | 1 | 0 | 0 | 0 | 0 | 0 | 1 |
| 20707 | Tiludronate Disodium              | FDA has this as not predead; falls within our two week rule |                                                                                           | Skelid             | 2/28/1996  | 3/7/1997   | 1996 | 16 | 12.26 | 0 | 1 | 1 | 0 | 0 | 0 | 0 | 0 | 0 | 1 | 0 | 0 | 0 | 0 | 0 | 0 | 0 | 1 |
| 21618 | Tinidazole                        | FDA has no BBW; we have BBW; FDA has 7/17/03 subdate        | There was a BBW labeling change, but not significant new safety information communicated. | Tindamax           | 7/16/2003  | 5/17/2004  | 2003 | 23 | 10.20 | 0 | 1 | 1 | 0 | 1 | 0 | 0 | 0 | 1 | 1 | 0 | 0 | 0 | 0 | 0 | 0 | 0 | 1 |
| 20484 | Tinzaparin Sodium                 |                                                             |                                                                                           | Innohep            | 6/30/1999  | 7/14/2000  | 1999 | 19 | 12.67 | 0 | 0 | 0 | 0 | 0 | 0 | 0 | 1 | 1 | 0 | 0 | 0 | 0 | 0 | 0 | 0 | 0 | 1 |
| 21395 | Tiotropium Bromide                | FDA has 12/13/2001 subdate                                  |                                                                                           | Spiriva Handihaler | 12/12/2001 | 1/30/2004  | 2001 | 21 | 25.97 | 0 | 0 | 0 | 0 | 0 | 0 | 0 | 0 | 1 | 0 | 0 | 0 | 0 | 0 | 0 | 0 | 0 | 1 |
| 21814 | Tipranavir                        | FDA has no BBW; we have BBW; FDA has 12/22/04 subdate       | We code significant new information added to BBW                                          | Aptivus            | 12/21/2004 | 6/22/2005  | 2004 | 24 | 6.10  | 1 | 1 | 1 | 0 | 1 | 0 | 1 | 0 | 1 | 1 | 1 | 0 | 0 | 0 | 0 | 0 | 0 | 1 |

|       |                          |                                                           |                |            |            |      |    |       |   |   |   |   |   |   |   |   |   |   |   |   |   |   |   |   |   |   |
|-------|--------------------------|-----------------------------------------------------------|----------------|------------|------------|------|----|-------|---|---|---|---|---|---|---|---|---|---|---|---|---|---|---|---|---|---|
| 20912 | Tirofiban Hydrochloride  | FDA has no predead; this is prob coding error on our part | Aggrastat      | 10/31/1997 | 5/14/1998  | 1997 | 17 | 6.41  | 1 | 1 | 1 | 0 | 0 | 0 | 0 | 0 | 1 | 0 | 1 | 0 | 0 | 0 | 0 | 0 | 0 | 1 |
| 20397 | Tizanidine Hydrochloride |                                                           | Zanaflex       | 12/6/1993  | 11/27/1996 | 1993 | 13 | 35.74 | 0 | 0 | 0 | 0 | 0 | 0 | 0 | 1 | 1 | 0 | 0 | 0 | 0 | 0 | 0 | 0 | 0 | 1 |
| 20697 | Tolcapone                | FDA does not have SBW; also FDA has 6/5/96 subdate        | Tasmar         | 6/3/1996   | 1/29/1998  | 1996 | 16 | 19.89 | 0 | 0 | 0 | 1 | 1 | 1 | 1 | 0 | 1 | 0 | 0 | 0 | 1 | 0 | 1 | 0 | 1 | 1 |
| 20771 | Tolterodine Tartrate     |                                                           | Detrol         | 3/25/1997  | 3/25/1998  | 1997 | 17 | 12.00 | 0 | 1 | 1 | 0 | 0 | 0 | 0 | 1 | 1 | 1 | 0 | 0 | 0 | 0 | 0 | 0 | 0 | 1 |
| 20505 | Topiramate               |                                                           | Topamax        | 12/30/1994 | 12/24/1996 | 1994 | 14 | 23.84 | 0 | 0 | 0 | 0 | 0 | 0 | 0 | 1 | 1 | 0 | 0 | 0 | 0 | 0 | 0 | 0 | 0 | 1 |
| 20671 | Topotecan Hydrochloride  |                                                           | Hycamtin       | 12/22/1995 | 5/28/1996  | 1995 | 15 | 5.19  | 1 | 1 | 1 | 0 | 0 | 0 | 0 | 1 | 1 | 1 | 1 | 0 | 0 | 0 | 0 | 0 | 0 | 1 |
| 20497 | Toremifene Citrate       |                                                           | Fareston       | 1/3/1995   | 5/29/1997  | 1995 | 15 | 28.83 | 0 | 0 | 0 | 0 | 0 | 0 | 0 | 1 | 1 | 0 | 0 | 0 | 0 | 0 | 0 | 0 | 0 | 1 |
| 20281 | Tramadol Hydrochloride   | Not in our data                                           | Ultram         | 11/18/1993 | 3/3/1995   | 1993 | 13 | 15.50 | 0 | 0 | 0 | 0 | 0 | 0 | 0 | 0 | 1 | 0 | 0 | 0 | 0 | 0 | 0 | 0 | 0 | 0 |
| 20528 | Trandolapril             |                                                           | Mavik          | 9/29/1994  | 4/26/1996  | 1994 | 14 | 18.90 | 0 | 0 | 0 | 0 | 0 | 0 | 0 | 1 | 1 | 0 | 0 | 0 | 0 | 0 | 0 | 0 | 0 | 1 |
| 21257 | Travoprost               | FDA has 7/7/2000 subdate                                  | Travatan       | 7/6/2000   | 3/16/2001  | 2000 | 20 | 8.43  | 1 | 0 | 0 | 0 | 0 | 0 | 0 | 0 | 1 | 0 | 1 | 0 | 0 | 0 | 0 | 0 | 0 | 1 |
| 21272 | Treprostinil Sodium      |                                                           | Remodulin      | 10/16/2000 | 5/21/2002  | 2000 | 20 | 19.40 | 1 | 0 | 0 | 0 | 0 | 0 | 0 | 1 | 1 | 0 | 1 | 0 | 0 | 0 | 0 | 0 | 0 | 1 |
| 20326 | Trimetrexate glucuronate |                                                           | Neutrexin      | 2/1/1993   | 12/17/1993 | 1993 | 13 | 10.49 | 1 | 0 | 0 | 0 | 0 | 0 | 0 | 1 | 1 | 0 | 1 | 0 | 0 | 0 | 0 | 0 | 0 | 1 |
| 20715 | Triptorelin Pamoate      | FDA 6/26/1996 subdate; we have recoded                    | Trelstar Depot | 12/16/1999 | 6/15/2000  | 1999 | 19 | 6.07  | 0 | 0 | 0 | 0 | 0 | 0 | 0 | 0 | 1 | 0 | 0 | 0 | 0 | 0 | 0 | 0 | 0 | 1 |
| 20720 | Troglitazone             |                                                           | Rezulin        | 8/1/1996   | 1/29/1997  | 1996 | 16 | 5.95  | 1 | 1 | 1 | 1 | 1 | 1 | 1 | 1 | 1 | 1 | 1 | 1 | 1 | 1 | 1 | 1 | 1 | 1 |
| 21595 | Trospium Chloride        | FDA has 4/29/03 subdate                                   | Sanctura       | 4/28/2003  | 5/28/2004  | 2003 | 23 | 13.20 | 0 | 0 | 0 | 0 | 0 | 0 | 0 | 0 | 1 | 0 | 0 | 0 | 0 | 0 | 0 | 0 | 0 | 1 |
| 20759 | Trovafloxacin Mesylate   | FDA has no SBW, has BBW                                   | Trovan         | 12/30/1996 | 12/18/1997 | 1996 | 16 | 11.61 | 0 | 1 | 1 | 1 | 1 | 1 | 1 | 0 | 1 | 1 | 0 | 0 | 1 | 0 | 1 | 0 | 1 | 1 |
| 21670 | Trypan Blue              | FDA has 10/27/03 subdate                                  | Vision Blue    | 10/24/2003 | 12/16/2004 | 2003 | 23 | 13.97 | 1 | 0 | 0 | 0 | 0 | 0 | 0 | 0 | 1 | 0 | 1 | 0 | 0 | 0 | 0 | 0 | 0 | 1 |
| 21214 | Unoprostone Isopropyl    | FDA has 2/15/00 subdate                                   | Rescula        | 2/14/2000  | 8/3/2000   | 2000 | 20 | 5.70  | 1 | 1 | 1 | 0 | 0 | 0 | 0 | 0 | 1 | 1 | 1 | 0 | 0 | 0 | 0 | 0 | 0 | 1 |
| 20617 | Urea C-14                | FDA has 5/22/95 subdate                                   | Pytest         | 5/16/1995  | 5/9/1997   | 1995 | 15 | 23.80 | 1 | 0 | 0 | 0 | 0 | 0 | 0 | 0 | 1 | 0 | 1 | 0 | 0 | 0 | 0 | 0 | 0 | 1 |
| 21341 | Valdecoxib               |                                                           | Bextra         | 1/16/2001  | 11/16/2001 | 2001 | 21 | 10.13 | 0 | 1 | 1 | 1 | 1 | 1 | 1 | 1 | 1 | 1 | 0 | 1 | 1 | 1 | 1 | 1 | 1 | 1 |
